# Supplementary material
Source: PubMed Central journal article supplement (PMC3373014)
Supplement: NIHMS111296-supplement-Supplementary_data.pdf [file NIHMS111296-supplement-Supplementary_data.pdf]

## Supplementary Material

| ASP1           |            |            | ASP2      |           |        |
|----------------|------------|------------|-----------|-----------|--------|
| atom name      | atom type  | charge     | atom name | atom type | charge |
| CB             | CT2        | -0.18      | CB        | CT2       | -0.18  |
| HB1            | HA         | 0.09       | HB1       | HA        | 0.09   |
| HB2            | HA         | 0.09       | HB2       | HA        | 0.09   |
| CG             | CD         | 0.61       | CG        | CD        | 0.51   |
| OD1            | OB         | -0.51      | OD1       | OB        | -0.51  |
| P              | P          | 1.50       | P         | P         | 1.10   |
| OD2            | ON2        | -0.62      | OD2       | ON2       | -0.40  |
| H2             | HN4        | 0.34       |           |           |        |
| OP1            | ON3        | -0.82      | OP1       | ON3       | -0.90  |
| OP2            | ON4        | -0.68      | OP2       | ON3       | -0.90  |
| OP3            | ON3        | -0.82      | OP3       | ON3       | -0.90  |
| bond terms     | $k_b$      | $b_0$      |           |           |        |
| ON2 CD         | 230.000    | 1.4000     |           |           |        |
| angle terms    | $k_\theta$ | $\theta_0$ | $k_{UB}$  | $S_0$     |        |
| CD ON2 P       | 20.0       | 120.0      | 35.       | 2.33      |        |
| ON2 CD CT2     | 55.000     | 110.5000   |           |           |        |
| ON2 CD CT3     | 55.000     | 110.5000   |           |           |        |
| ON2 CD OB      | 50.000     | 123.00     | 210.00    | 2.26200   |        |
| dihedral terms | $k_\chi$   | n          | $\delta$  |           |        |
| X CD ON2 X     | 10.0       | 1          | 180.0     |           |        |
| X CD ON2 X     | 2.25       | 2          | 180.00    |           |        |
| X CD ON2 X     | 1.36       | 3          | 180.00    |           |        |
| CD ON2 P ON3   | 0.1        | 3          | 0.00      |           |        |

Table 1: Parameters for ASP1 and ASP2 compatible with the combined protein and nucleic acid CHARMM27 parameter and topology files.

| atom | chrg  | epsi  | sigm  | radi  |
|------|-------|-------|-------|-------|
| ASP2 |       |       |       |       |
| CB   | -0.10 | 0.118 | 3.905 | 1.952 |
| HB1  | 0.05  | 0.000 | 0.000 | 1.200 |
| HB2  | 0.05  | 0.000 | 0.000 | 1.200 |
| CG   | 0.70  | 0.105 | 3.750 | 1.875 |
| OD1  | -0.55 | 0.210 | 2.960 | 1.480 |
| P    | 1.10  | 0.200 | 3.74  | 1.870 |
| OD2  | -0.55 | 0.210 | 2.960 | 1.480 |
| OP1  | -0.9  | 0.210 | 2.96  | 1.480 |
| OP2  | -0.9  | 0.210 | 2.96  | 1.480 |
| OP3  | -0.9  | 0.210 | 2.96  | 1.480 |
| N    | -0.40 | 0.170 | 3.250 | 1.625 |
| HN   | 0.25  | 0.000 | 0.000 | 1.200 |
| CA   | 0.05  | 0.080 | 3.800 | 1.900 |
| HA   | 0.05  | 0.000 | 0.000 | 1.200 |
| C    | 0.60  | 0.105 | 3.750 | 1.875 |
| O    | -0.55 | 0.210 | 2.960 | 1.480 |
| ASP1 |       |       |       |       |
| CB   | -0.10 | 0.118 | 3.905 | 1.952 |
| HB1  | 0.05  | 0.000 | 0.000 | 1.200 |
| HB2  | 0.05  | 0.000 | 0.000 | 1.200 |
| CG   | 0.70  | 0.105 | 3.750 | 1.875 |
| OD1  | -0.55 | 0.210 | 2.960 | 1.480 |
| P    | 1.50  | 0.200 | 3.74  | 1.870 |
| OD2  | -0.63 | 0.210 | 2.960 | 1.480 |
| H2   | 0.33  | 0.000 | 0.000 | 1.200 |
| OP1  | -0.83 | 0.210 | 2.96  | 1.480 |
| OP2  | -0.69 | 0.210 | 2.96  | 1.480 |
| OP3  | -0.83 | 0.210 | 2.96  | 1.480 |
| N    | -0.40 | 0.170 | 3.250 | 1.625 |
| HN   | 0.25  | 0.000 | 0.000 | 1.200 |
| CA   | 0.05  | 0.080 | 3.800 | 1.900 |
| HA   | 0.05  | 0.000 | 0.000 | 1.200 |
| C    | 0.60  | 0.105 | 3.750 | 1.875 |
| O    | -0.55 | 0.210 | 2.960 | 1.480 |

Table 2: Parameters for ASP1 and ASP2 used in file pkaS.dat for Poisson-Boltzmann calculations.
